# Supplementary material for: Comparison of metabolic syndrome prevalence using four different definitions – a population-based study in Finland
Source: PubMed Central journal article supplement (PMC8697452; doi:10.1186/s13690-021-00749-3), 2021-12-23

# Comparison of metabolic syndrome prevalence using four different definitions – a population-based study in Finland

Haverinen E., Paalanen L., Palmieri L., Padron-Monedero A., Noguera-Zambrano I., Sarmiento Suárez R. & Tolonen H.

Additional file 1.

## A. Metabolic syndrome (MetS) prevalence (%) in men in different age groups

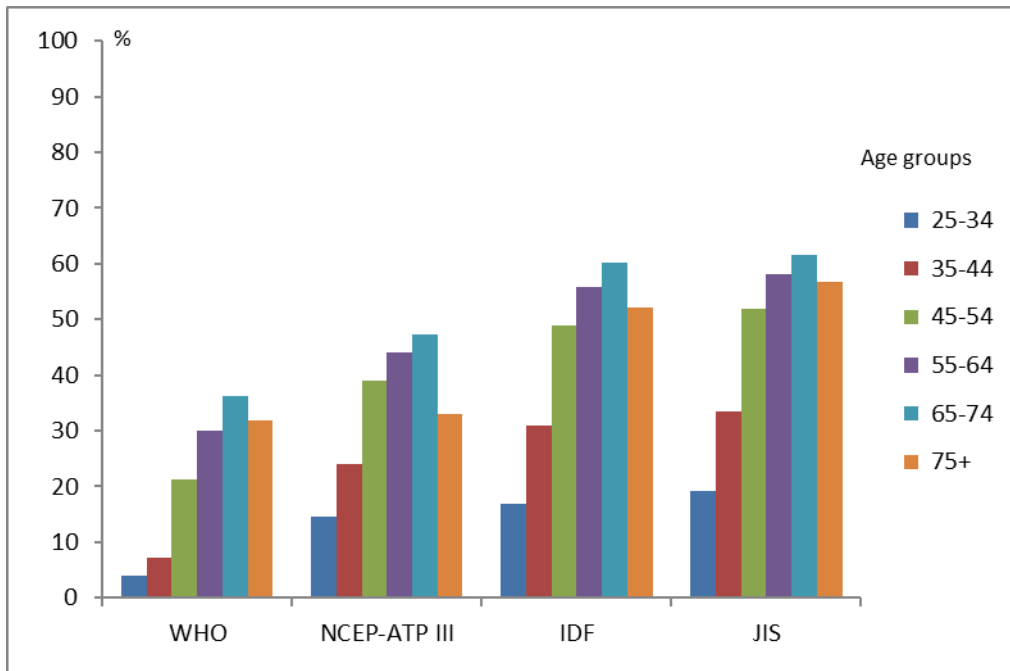

## B. Metabolic syndrome (MetS) prevalence (%) among women in different age groups

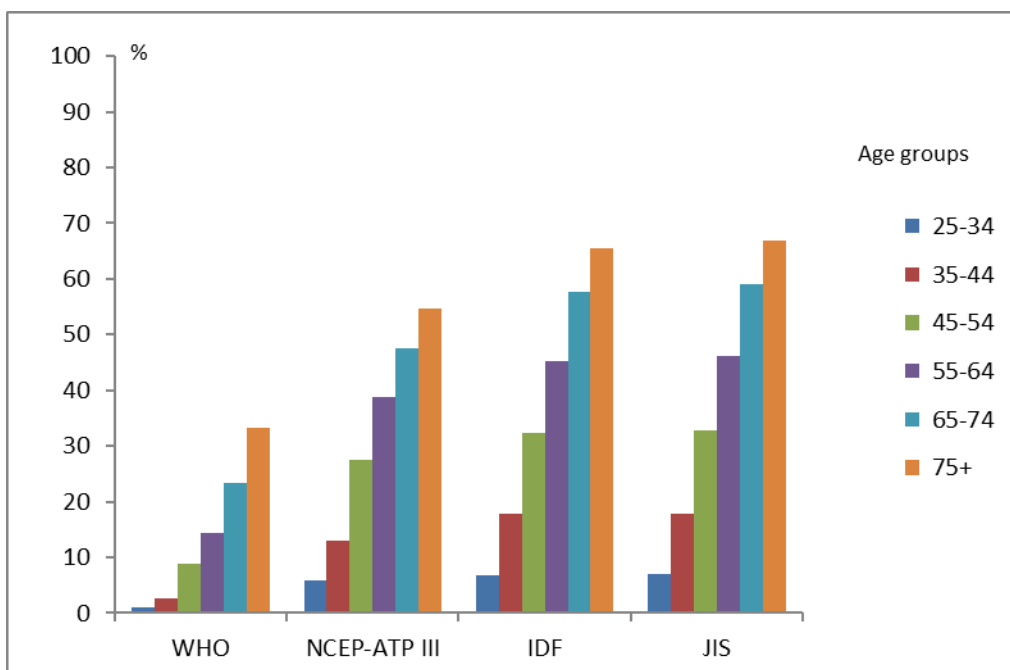

Supplement: 13690_2021_749_MOESM1_ESM.pdf [file 13690_2021_749_MOESM1_ESM.pdf]
