# Supplementary material for: Comparison of metabolic syndrome prevalence using four different definitions – a population-based study in Finland
Source: PubMed Central journal article supplement (PMC8697452; doi:10.1186/s13690-021-00749-3), 2021-12-23
Supplement: 13690_2021_749_MOESM2_ESM.pdf [file 13690_2021_749_MOESM2_ESM.pdf]

## Comparison of metabolic syndrome prevalence using four different definitions – a population-based study in Finland

Haverinen E., Paalanen L., Palmieri L., Padron-Monedero A., Noguera-Zambrano I., Sarmiento Suárez R. & Tolonen H.

Additional file 2.

Prevalence of WHO metabolic syndrome components for total population, by gender and age groups

| <b>Total population and 95% CI identified with WHO obesity component (BMI ≥30 or waist-to-hip-ratio (WHR) m: 0.90, f: 0.85) (%)</b>                                                     | <b>Age groups</b> | <b>WHO obesity component, men (%)</b> | <b>95% CI</b> | <b>WHO obesity component, women (%)</b> | <b>95% CI</b> |
|-----------------------------------------------------------------------------------------------------------------------------------------------------------------------------------------|-------------------|---------------------------------------|---------------|-----------------------------------------|---------------|
| 75.3 (74.2-76.4)                                                                                                                                                                        | <b>Total</b>      | 87.5                                  | 86.2-88.7     | 64.8                                    | 63.1-66.5     |
|                                                                                                                                                                                         | <b>25-34</b>      | 65.7                                  | 60.7-70.3     | 40.5                                    | 36.0-45.2     |
|                                                                                                                                                                                         | <b>35-44</b>      | 80.8                                  | 76.8-84.3     | 53.6                                    | 49.2-58.0     |
|                                                                                                                                                                                         | <b>45-54</b>      | 92.2                                  | 89.4-94.3     | 65.1                                    | 61.0-69.0     |
|                                                                                                                                                                                         | <b>55-64</b>      | 93.0                                  | 90.7-94.8     | 72.9                                    | 69.3-76.3     |
|                                                                                                                                                                                         | <b>65-74</b>      | 94.4                                  | 92.1-96.1     | 75.9                                    | 72.3-79.1     |
|                                                                                                                                                                                         | <b>75-</b>        | 95.7                                  | 92.3-97.6     | 75.7                                    | 71.1-79.8     |
| <b>BMI (%)</b>                                                                                                                                                                          | <b>Age groups</b> | <b>WHO BMI, men (%)</b>               | <b>95% CI</b> | <b>WHO BMI, women (%)</b>               | <b>95% CI</b> |
| 25.9 (24.8-27.1)                                                                                                                                                                        | <b>Total</b>      | 25.4                                  | 23.8-27.1     | 26.3                                    | 24.8-27.9     |
|                                                                                                                                                                                         | <b>25-34</b>      | 20.4                                  | 16.6-24.8     | 15.7                                    | 12.6-19.4     |
|                                                                                                                                                                                         | <b>35-44</b>      | 20.8                                  | 17.2-24.9     | 21.0                                    | 17.6-24.8     |
|                                                                                                                                                                                         | <b>45-54</b>      | 28.3                                  | 24.4-32.5     | 28.5                                    | 24.9-32.4     |
|                                                                                                                                                                                         | <b>55-64</b>      | 30.9                                  | 27.3-34.7     | 29.1                                    | 25.7-32.8     |
|                                                                                                                                                                                         | <b>65-74</b>      | 29.3                                  | 25.5-33.4     | 29.7                                    | 26.2-33.5     |
|                                                                                                                                                                                         | <b>75-</b>        | 13.5                                  | 9.7-18.4      | 32.2                                    | 27.6-37.1     |
| <b>WHR (%)</b>                                                                                                                                                                          | <b>Age groups</b> | <b>WHO WHR, men (%)</b>               |               | <b>WHO WHR, women (%)</b>               |               |
| 72.6 (71.4-73.7)                                                                                                                                                                        | <b>Total</b>      | 87.2                                  | 85.9-88.4     | 60.2                                    | 58.5-61.9     |
|                                                                                                                                                                                         | <b>25-34</b>      | 64.6                                  | 59.6-69.3     | 35.3                                    | 31.0-39.9     |
|                                                                                                                                                                                         | <b>35-44</b>      | 80.3                                  | 76.2-83.8     | 48.1                                    | 43.7-52.5     |
|                                                                                                                                                                                         | <b>45-54</b>      | 91.8                                  | 89.0-93.9     | 59.9                                    | 55.7-63.9     |
|                                                                                                                                                                                         | <b>55-64</b>      | 92.9                                  | 90.6-94.7     | 68.9                                    | 65.1-72.4     |
|                                                                                                                                                                                         | <b>65-74</b>      | 94.4                                  | 92.1-96.1     | 71.8                                    | 68.1-75.2     |
|                                                                                                                                                                                         | <b>75-</b>        | 95.3                                  | 91.8-97.3     | 72.6                                    | 67.8-76.9     |
| <b>Total population and 95% CI identified with WHO lipid component (TG ≥ 150 mg/dl (1.7 mmol/L) and/ or M: HDL-C &lt; 35 mg/dl (0.9 mmol/l) F: HDL-C &lt; 39 mg/dl (1.0 mmol/l) (%)</b> | <b>Age groups</b> | <b>WHO lipid component, men (%)</b>   | <b>95% CI</b> | <b>WHO lipid component, women (%)</b>   | <b>95% CI</b> |
| 24.2 (23.1-25.3)                                                                                                                                                                        | <b>Total</b>      | 30.5                                  | 28.8-32.3     | 18.9                                    | 17.6-20.3     |
|                                                                                                                                                                                         | <b>25-34</b>      | 20.1                                  | 16.3-24.5     | 7.4                                     | 5.3-10.3      |
|                                                                                                                                                                                         | <b>35-44</b>      | 28.7                                  | 24.6-33.2     | 11.0                                    | 8.5-14.1      |
|                                                                                                                                                                                         | <b>45-54</b>      | 43.1                                  | 38.7-47.6     | 19.0                                    | 15.9-22.5     |
|                                                                                                                                                                                         | <b>55-64</b>      | 33.7                                  | 30.0-37.6     | 24.0                                    | 20.8-27.5     |
|                                                                                                                                                                                         | <b>65-74</b>      | 28.7                                  | 25.0-32.7     | 24.2                                    | 21.0-27.8     |
|                                                                                                                                                                                         | <b>75-</b>        | 20.8                                  | 16.1-26.4     | 25.2                                    | 21.0-29.9     |
|                                                                                                                                                                                         |                   |                                       |               |                                         | 18.3-33.6     |

| <b>Total population and 95% CI identified with WHO blood pressure (BP) component (<math>\geq 140/90</math> or medication) (%)</b>             | <b>Age groups</b> | <b>WHO BP component, men (%)</b>      | <b>95% CI</b> | <b>WHO BP component, women (%)</b>      | <b>95% CI</b> |
|-----------------------------------------------------------------------------------------------------------------------------------------------|-------------------|---------------------------------------|---------------|-----------------------------------------|---------------|
| 50.3 (49.0-51.6)                                                                                                                              | <b>Total</b>      | 54.5                                  | 52.6-56.4     | 46.8                                    | 45.0-48.6     |
|                                                                                                                                               | <b>25-34</b>      | 19.8                                  | 16.1-24.1     | 6.7                                     | 4.7-9.5       |
|                                                                                                                                               | <b>35-44</b>      | 29.8                                  | 25.6-34.3     | 14.6                                    | 11.8-18.0     |
|                                                                                                                                               | <b>45-54</b>      | 49.2                                  | 44.7-53.7     | 39.9                                    | 35.9-44.1     |
|                                                                                                                                               | <b>55-64</b>      | 68.1                                  | 64.3-71.7     | 54.6                                    | 50.7-58.5     |
|                                                                                                                                               | <b>65-74</b>      | 79.0                                  | 75.3-82.3     | 74.8                                    | 71.2-78.1     |
|                                                                                                                                               | <b>75-</b>        | 75.8                                  | 70.0-80.8     | 87.8                                    | 84.1-90.8     |
| <b>Total population and 95% CI identified with WHO glucose component (FPG <math>\geq 110</math> mg/dl (6.1 mmol/l) or T2DM diagnosis) (%)</b> | <b>Age groups</b> | <b>WHO glucose component, men (%)</b> | <b>95% CI</b> | <b>WHO glucose component, women (%)</b> | <b>95% CI</b> |
| 22.6 (21.5-23.7)                                                                                                                              | <b>Total</b>      | 28.3                                  | 26.6-30.1     | 17.8                                    | 16.5-19.2     |
|                                                                                                                                               | <b>25-34</b>      | 8.4                                   | 6.0-11.7      | 2.3                                     | 1.3-4.2       |
|                                                                                                                                               | <b>35-44</b>      | 15.0                                  | 11.9-18.7     | 6.1                                     | 4.3-8.6       |
|                                                                                                                                               | <b>45-54</b>      | 27.3                                  | 23.5-31.5     | 12.5                                    | 10.0-15.5     |
|                                                                                                                                               | <b>55-64</b>      | 34.2                                  | 30.5-38.1     | 19.2                                    | 16.3-22.5     |
|                                                                                                                                               | <b>65-74</b>      | 42.0                                  | 37.8-46.3     | 29.0                                    | 25.5-32.7     |
|                                                                                                                                               | <b>75-</b>        | 40.3                                  | 34.2-46.7     | 39.1                                    | 34.3-44.2     |

WHO= World Health Organization, BMI= body mass index, WHR= waist-to-hip-ratio, HDL-C= high density

lipoprotein cholesterol, TGs= triglycerides, BP= blood pressure, T2DM= type 2 diabetes mellitus, FPG= fasting plasma glucose
