# Supplementary material for: Comparison of metabolic syndrome prevalence using four different definitions – a population-based study in Finland
Source: PubMed Central journal article supplement (PMC8697452; doi:10.1186/s13690-021-00749-3), 2021-12-23
Supplement: 13690_2021_749_MOESM3_ESM.pdf [file 13690_2021_749_MOESM3_ESM.pdf]

## Comparison of metabolic syndrome prevalence using four different definitions – a population-based study in Finland

Haverinen E., Paalanen L., Palmieri L., Padron-Monedero A., Noguera-Zambrano I., Sarmiento Suárez R. & Tolonen H.

Additional file 3.

Prevalence of NCEP-ATP III metabolic syndrome components for total population, by gender and age groups

| <b>Total population and 95% CI identified with NCEP-ATP III obesity component (waist circumference (WC) M: 102 cm, f: 88 cm) (%)</b>                         | <b>Age groups</b> | <b>NCEP-ATP III WC component, men (%)</b>           | <b>95% CI</b> | <b>NCEP-ATP III WC component, women (%)</b>           | <b>95% CI</b> |
|--------------------------------------------------------------------------------------------------------------------------------------------------------------|-------------------|-----------------------------------------------------|---------------|-------------------------------------------------------|---------------|
| 44.3 (43.0-45.6)                                                                                                                                             | <b>Total</b>      | 37.7                                                | 35.9-39.6     | 50.0                                                  | 48.2-51.8     |
|                                                                                                                                                              | <b>25-34</b>      | 16.1                                                | 12.7-20.2     | 22.1                                                  | 18.5-26.2     |
|                                                                                                                                                              | <b>35-44</b>      | 24.9                                                | 21.0-29.2     | 38.3                                                  | 34.1-42.7     |
|                                                                                                                                                              | <b>45-54</b>      | 38.4                                                | 34.1-42.8     | 48.2                                                  | 44.0-52.4     |
|                                                                                                                                                              | <b>55-64</b>      | 49.0                                                | 45.0-53.0     | 57.7                                                  | 53.8-61.5     |
|                                                                                                                                                              | <b>65-74</b>      | 50.1                                                | 45.8-54.4     | 63.6                                                  | 59.7-67.3     |
|                                                                                                                                                              | <b>75-</b>        | 37.3                                                | 31.4-43.6     | 66.1                                                  | 61.1-70.7     |
| <b>Total population and 95% CI identified with NCEP-ATP III triglyceride component (TG ≥ 150 mg/dl (1.7 mmol/L) (%)</b>                                      | <b>Age groups</b> | <b>NCEP-ATP III triglyceride component, men (%)</b> | <b>95% CI</b> | <b>NCEP-ATP III triglyceride component, women (%)</b> | <b>95% CI</b> |
| 22.9 (21.8-24.0)                                                                                                                                             | <b>Total</b>      | 28.8                                                | 27.1-30.6     | 17.8                                                  | 16.5-19.2     |
|                                                                                                                                                              | <b>25-34</b>      | 18.0                                                | 14.4-22.2     | 6.5                                                   | 4.5-9.2       |
|                                                                                                                                                              | <b>35-44</b>      | 27.3                                                | 23.3-31.7     | 9.3                                                   | 7.0-12.2      |
|                                                                                                                                                              | <b>45-54</b>      | 42.0                                                | 37.6-46.5     | 17.8                                                  | 14.8-21.2     |
|                                                                                                                                                              | <b>55-64</b>      | 31.5                                                | 27.9-35.3     | 23.7                                                  | 20.5-27.2     |
|                                                                                                                                                              | <b>65-74</b>      | 27.2                                                | 23.5-31.2     | 22.9                                                  | 19.7-26.4     |
|                                                                                                                                                              | <b>75-</b>        | 18.6                                                | 14.2-24.1     | 24.4                                                  | 20.3-29.0     |
| <b>Total population and 95% CI identified with NCEP-ATP III HDL-C component M: HDL-C &lt; 40 mg/dl (1.03 mmol/l) F: HDL-C &lt; 50 mg/dl (1.3 mmol/l) (%)</b> | <b>Age groups</b> | <b>NCEP-ATP III HDL-C component, men (%)</b>        | <b>95% CI</b> | <b>NCEP-ATP III HDL-C component, women (%)</b>        | <b>95% CI</b> |
| 17.8 (16.8-18.8)                                                                                                                                             | <b>Total</b>      | 15.5                                                | 14.2-16.9     | 19.8                                                  | 18.4-21.2     |
|                                                                                                                                                              | <b>25-34</b>      | 15.5                                                | 12.2-19.5     | 16.4                                                  | 13.2-20.2     |
|                                                                                                                                                              | <b>35-44</b>      | 16.4                                                | 13.2-20.2     | 22.5                                                  | 19.0-26.4     |
|                                                                                                                                                              | <b>45-54</b>      | 16.2                                                | 13.2-19.8     | 19.8                                                  | 16.7-23.3     |
|                                                                                                                                                              | <b>55-64</b>      | 14.9                                                | 12.3-18.0     | 17.2                                                  | 14.4-20.4     |
|                                                                                                                                                              | <b>65-74</b>      | 16.4                                                | 13.5-19.8     | 18.8                                                  | 15.9-22.1     |
|                                                                                                                                                              | <b>75-</b>        | 12.3                                                | 8.7-17.1      | 26.3                                                  | 22.1-31.0     |
| <b>Total population and 95% CI identified with NCEP-ATP III blood pressure (BP) component (≥130/85) (%)</b>                                                  | <b>Age groups</b> | <b>NCEP-ATP III BP component, men (%)</b>           | <b>95% CI</b> | <b>NCEP-ATP III BP component, women (%)</b>           | <b>95% CI</b> |
| 60.0 (58.7-61.3)                                                                                                                                             | <b>Total</b>      | 66.0                                                | 64.2-67.8     | 54.9                                                  | 53.1-56.7     |
|                                                                                                                                                              | <b>25-34</b>      | 44.8                                                | 39.8-49.9     | 17.1                                                  | 13.9-20.9     |
|                                                                                                                                                              | <b>35-44</b>      | 53.9                                                | 49.1-58.6     | 28.4                                                  | 24.6-32.5     |
|                                                                                                                                                              | <b>45-54</b>      | 65.5                                                | 61.1-69.6     | 54.2                                                  | 50.0-58.3     |
|                                                                                                                                                              | <b>55-64</b>      | 74.0                                                | 70.3-77.4     | 64.0                                                  | 60.1-67.7     |
|                                                                                                                                                              | <b>65-74</b>      | 80.0                                                | 76.3-83.2     | 77.9                                                  | 74.4-81.0     |
|                                                                                                                                                              | <b>75-</b>        | 70.8                                                | 64.7-76.2     | 82.7                                                  | 78.5-86.2     |

| <b>Total population and 95% CI identified with NCEP-ATP III glucose component (FPG &gt;100 mg/dl (5.6 mmol/l) or medication) (%)</b> | <b>Age groups</b> | <b>NCEP-ATP III glucose component, men (%)</b> | <b>95% CI</b> | <b>NCEP-ATP III glucose component, women (%)</b> | <b>95% CI</b> |
|--------------------------------------------------------------------------------------------------------------------------------------|-------------------|------------------------------------------------|---------------|--------------------------------------------------|---------------|
| 50.4 (49.1-51.7)                                                                                                                     | <b>Total</b>      | 60.1                                           | 58.2-62.0     | 42.1                                             | 40.4-43.9     |
|                                                                                                                                      | <b>25-34</b>      | 40.2                                           | 35.3-45.3     | 11.8                                             | 9.1-15.2      |
|                                                                                                                                      | <b>35-44</b>      | 47.3                                           | 42.6-52.1     | 19.9                                             | 16.6-23.7     |
|                                                                                                                                      | <b>45-54</b>      | 59.2                                           | 54.7-63.5     | 38.3                                             | 34.3-42.4     |
|                                                                                                                                      | <b>55-64</b>      | 65.9                                           | 62.9-69.6     | 47.5                                             | 43.6-51.4     |
|                                                                                                                                      | <b>65-74</b>      | 73.2                                           | 69.2-76.8     | 63.4                                             | 59.5-67.1     |
|                                                                                                                                      | <b>75-</b>        | 72.0                                           | 66.0-77.3     | 69.4                                             | 64.5-73.9     |

NCEP-ATP III= National Cholesterol Education Program Adult Treatment Panel III, WC= waist circumference, HDL-C= high density lipoprotein cholesterol, TGs= triglycerides, BP= blood pressure, T2DM= type 2 diabetes mellitus, FPG= fasting plasma glucose
