# Supplementary material for: Comparison of metabolic syndrome prevalence using four different definitions – a population-based study in Finland
Source: PubMed Central journal article supplement (PMC8697452; doi:10.1186/s13690-021-00749-3), 2021-12-23
Supplement: 13690_2021_749_MOESM4_ESM.pdf [file 13690_2021_749_MOESM4_ESM.pdf]

## Comparison of metabolic syndrome prevalence using four different definitions – a population-based study in Finland

Haverinen E., Paalanen L., Palmieri L., Padron-Monedero A., Noguera-Zambrano I., Sarmiento Suárez R. & Tolonen H.

Additional file 4.

Prevalence of IDF metabolic syndrome components for total population, by gender and age groups

| <b>Total population and 95% CI identified with IDF obesity component (waist circumference (WC) M: 94 cm, F: 80 cm) (%)</b>                          | <b>Age groups</b> | <b>IDF WC component, men (%)</b>           | <b>95% CI</b> | <b>IDF WC component, women (%)</b>           | <b>95% CI</b> |
|-----------------------------------------------------------------------------------------------------------------------------------------------------|-------------------|--------------------------------------------|---------------|----------------------------------------------|---------------|
| 68.1 (66.9-69.3)                                                                                                                                    | <b>Total</b>      | 63.4                                       | 61.5-65.2     | 72.0                                         | 70.4-73.6     |
|                                                                                                                                                     | <b>25-34</b>      | 32.2                                       | 27.7-37.1     | 45.9                                         | 41.3-50.6     |
|                                                                                                                                                     | <b>35-44</b>      | 52.5                                       | 47.7-57.2     | 61.3                                         | 56.9-65.5     |
|                                                                                                                                                     | <b>45-54</b>      | 64.7                                       | 60.3-68.9     | 72.2                                         | 68.3-75.8     |
|                                                                                                                                                     | <b>55-64</b>      | 75.2                                       | 71.6-78.5     | 81.0                                         | 77.7-83.9     |
|                                                                                                                                                     | <b>65-74</b>      | 75.9                                       | 72.0-79.4     | 82.4                                         | 79.2-85.2     |
|                                                                                                                                                     | <b>75-</b>        | 72.9                                       | 66.9-78.2     | 84.8                                         | 80.8-88.1     |
| <b>Total population and 95% CI identified with IDF triglyceride component (TG ≥ 150 mg/dl (1.7 mmol/L)) (%)</b>                                     | <b>Age groups</b> | <b>IDF triglyceride component, men (%)</b> | <b>95% CI</b> | <b>IDF triglyceride component, women (%)</b> | <b>95% CI</b> |
| 22.9 (21.8-24.0)                                                                                                                                    | <b>Total</b>      | 28.8                                       | 27.1-30.6     | 17.8                                         | 16.5-19.2     |
|                                                                                                                                                     | <b>25-34</b>      | 18.0                                       | 14.4-22.2     | 6.5                                          | 4.5-9.2       |
|                                                                                                                                                     | <b>35-44</b>      | 27.3                                       | 23.3-31.7     | 9.3                                          | 7.0-12.2      |
|                                                                                                                                                     | <b>45-54</b>      | 42.0                                       | 37.6-46.5     | 17.8                                         | 14.8-21.2     |
|                                                                                                                                                     | <b>55-64</b>      | 31.5                                       | 27.9-35.3     | 23.7                                         | 20.5-27.2     |
|                                                                                                                                                     | <b>65-74</b>      | 27.2                                       | 23.5-31.2     | 22.9                                         | 19.7-26.4     |
|                                                                                                                                                     | <b>75-</b>        | 18.6                                       | 14.2-24.1     | 24.4                                         | 20.3-29.0     |
| <b>Total population and 95% CI identified with IDF HDL-C component M: HDL-C &lt; 40 mg/dl (1.03 mmol/l) F: HDL-C &lt; 50 mg/dl (1.3 mmol/l) (%)</b> | <b>Age groups</b> | <b>IDF HDL-C component, men (%)</b>        | <b>95% CI</b> | <b>IDF HDL-C component, women (%)</b>        | <b>95% CI</b> |
| 17.8 (16.8-18.8)                                                                                                                                    | <b>Total</b>      | 15.5                                       | 14.2-16.9     | 19.8                                         | 18.4-21.2     |
|                                                                                                                                                     | <b>25-34</b>      | 15.5                                       | 12.2-19.5     | 16.4                                         | 13.2-20.2     |
|                                                                                                                                                     | <b>35-44</b>      | 16.4                                       | 13.2-20.2     | 22.5                                         | 19.0-26.4     |
|                                                                                                                                                     | <b>45-54</b>      | 16.2                                       | 13.2-19.8     | 19.8                                         | 16.7-23.3     |
|                                                                                                                                                     | <b>55-64</b>      | 14.9                                       | 12.3-18.0     | 17.2                                         | 14.4-20.4     |
|                                                                                                                                                     | <b>65-74</b>      | 16.4                                       | 13.5-19.8     | 18.8                                         | 15.9-22.1     |
|                                                                                                                                                     | <b>75-</b>        | 12.3                                       | 8.7-17.1      | 26.3                                         | 22.1-31.0     |
| <b>Total population and 95% CI identified with IDF blood pressure (BP) component (≥130/85 or medication) (%)</b>                                    | <b>Age groups</b> | <b>IDF BP component, men (%)</b>           | <b>95% CI</b> | <b>IDF BP component, women (%)</b>           | <b>95% CI</b> |
| 65.5 (64.3-66.7)                                                                                                                                    | <b>Total</b>      | 71.8                                       | 70.0-73.5     | 60.0                                         | 58.3-61.7     |
|                                                                                                                                                     | <b>25-34</b>      | 45.8                                       | 40.8-50.9     | 17.3                                         | 14.0-21.1     |
|                                                                                                                                                     | <b>35-44</b>      | 54.6                                       | 49.8-59.3     | 29.4                                         | 25.6-33.6     |

|                                                                                                                                                |                   |                                       |               |                                         |               |
|------------------------------------------------------------------------------------------------------------------------------------------------|-------------------|---------------------------------------|---------------|-----------------------------------------|---------------|
|                                                                                                                                                | <b>45-54</b>      | 69.3                                  | 65.0-73.3     | 57.7                                    | 53.5-61.8     |
|                                                                                                                                                | <b>55-64</b>      | 81.4                                  | 78.1-84.3     | 71.0                                    | 67.3-74.4     |
|                                                                                                                                                | <b>65-74</b>      | 89.8                                  | 86.9-92.1     | 86.5                                    | 83.6-89.0     |
|                                                                                                                                                | <b>75-</b>        | 85.2                                  | 80.1-89.2     | 93.0                                    | 89.9-95.2     |
| <b>Total population and 95% CI identified with IDF glucose component (FPG <math>\geq</math> 100 mg /dl (5.6 mmol/l) or T2DM diagnoses) (%)</b> | <b>Age groups</b> | <b>IDF glucose component, men (%)</b> | <b>95% CI</b> | <b>IDF glucose component, women (%)</b> | <b>95% CI</b> |
| 50.3 (49.0-51.6)                                                                                                                               | <b>Total</b>      | 60.1                                  | 58.2-62.0     | 42.0                                    | 40.3-43.8     |
|                                                                                                                                                | <b>25-34</b>      | 40.2                                  | 35.3-45.3     | 11.3                                    | 8.7-14.6      |
|                                                                                                                                                | <b>35-44</b>      | 47.5                                  | 42.8-52.3     | 19.7                                    | 16.4-23.4     |
|                                                                                                                                                | <b>45-54</b>      | 59.2                                  | 54.7-63.5     | 38.1                                    | 34.1-42.2     |
|                                                                                                                                                | <b>55-64</b>      | 65.8                                  | 61.9-69.5     | 47.2                                    | 43.3-51.1     |
|                                                                                                                                                | <b>65-74</b>      | 73.8                                  | 69.9-77.4     | 63.4                                    | 59.5-67.1     |
|                                                                                                                                                | <b>75-</b>        | 71.6                                  | 65.5-77.0     | 69.6                                    | 64.7-74.1     |

IDF=International Diabetes Federation, WC= waist circumference, HDL-C= high density lipoprotein cholesterol, TGs= triglycerides, BP= blood pressure, T2DM= type 2 diabetes mellitus, FPG= fasting plasma glucose
